# Supplementary material for: Novel understanding of carbothermal reduction enhancing electronic and ionic conductivity of Li4Ti5O12 anode
Source: Royal Society of Chemistry journal article supplement (doi:10.1039/c5ta00887e), 2015-01-01
Supplement: c5ta00887e1.pdf [file c5ta00887e1.pdf]

## Supporting Information

### Novel Understanding of Carbothermal Reduction Enhancing

#### Electronic and Ionic Conductivity of $\text{Li}_4\text{Ti}_5\text{O}_{12}$ Anode

Bo Yan,<sup>a, b, c</sup> Minsi Li,<sup>d</sup> Xifei Li,<sup>\*b</sup> Zhimin Bai,<sup>\*a</sup> Jianwen Yang,<sup>\*c</sup> Dongbin Xiong,<sup>b</sup>

Dejun Li<sup>b</sup>

<sup>a</sup>*Beijing Key Laboratory of Materials Utilization of Nonmetallic Minerals and Solid Wastes, National Laboratory of Mineral Materials, School of Materials Science and Technology, China University of Geosciences, Beijing, 100083. E-mail: [zhimibai@cugb.edu.cn](mailto:zhimibai@cugb.edu.cn); Tel: +86-13691115187*

<sup>b</sup>*Energy & Materials Engineering Centre, College of Physics and Materials Science, Tianjin Normal University, Tianjin 300387, China. E-mail: [xfli2011@hotmail.com](mailto:xfli2011@hotmail.com); Tel: +86-22-23766526, Fax: +86-22-23766503*

<sup>c</sup>*College of Chemistry and Bioengineering, Guilin University of Technology, Guilin, 541004, China. E-mail: [yangjw@glite.edu.cn](mailto:yangjw@glite.edu.cn); Tel: +86-773-5896446*

<sup>d</sup>*CAS Key Laboratory of Materials for Energy Conversion, Department of Materials Science and Engineering, University of Science and Technology of China, Anhui, Hefei 230026, P. R. China*

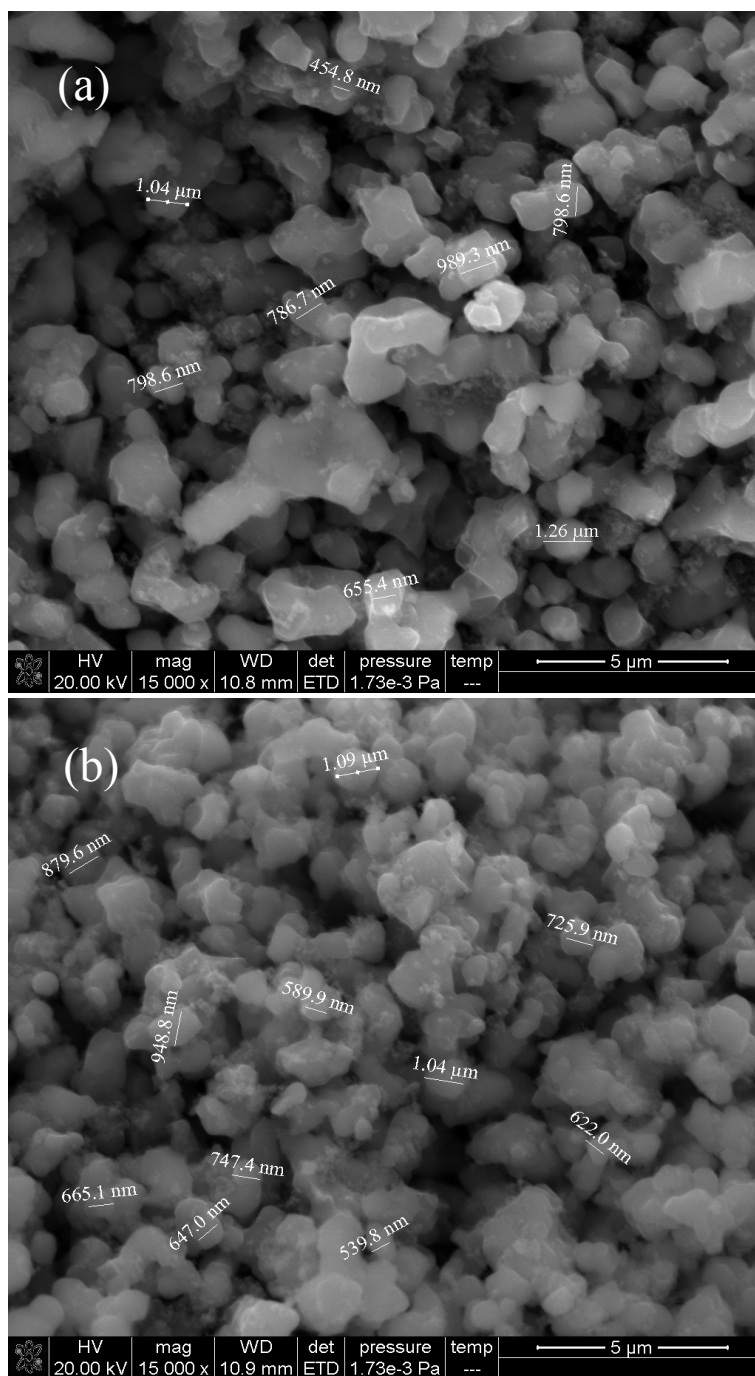

Fig. S1 High- magnification SEM images of (a) LTO-W and (b) LTO-B.
